# Supplementary material for: Modelling interactions of cationic dimers in He droplets: microsolvation trends in HenK2+ clusters
Source: Royal Society of Chemistry journal article supplement (doi:10.1039/d0cp05406b), 2020-11-11
Supplement: d0cp05406b6.pdf [file d0cp05406b6.pdf]

# Modelling interactions of cationic dimers in He droplets: microsolvation trends in $\text{He}_n\text{K}_2^+$ clusters

Nissrin Alharzali<sup>a,b</sup>, Raúl Rodríguez-Segundo<sup>a,c</sup>, and Rita Prosimi<sup>a\*</sup>

<sup>a</sup>*Institute of Fundamental Physics (IFF-CSIC), CSIC, Serrano 123, 28006 Madrid, Spain*

<sup>b</sup>*Laboratory of Interfaces and Advanced Materials, Faculty of Science, University of Monastir, 5019 Monastir, Tunisia*

<sup>c</sup>*Atelgraphics S.L., Mota de Cuervo 42, 28043 Madrid, Spain*

E-mail: rita@iff.csic.es

## Supplementary material

Table S1: Spectroscopic constants,  $r_e$  (in Å),  $\omega_e$  (in  $\text{cm}^{-1}$ ) and  $D_e$  (in  $\text{cm}^{-1}$ ) for the  $\text{K}_2^+$  at the indicated level of theory or experiment.

| Methods/Basis set            | $r_e$ | $\omega_e$ | $D_e$      |
|------------------------------|-------|------------|------------|
| UCCSD(T)/AV6Z                | 4.80  | 67.7       | 6591       |
| MRCI+Q/AV6Z                  | 4.80  | 66.3       | 6427       |
| Theory [Ref. <sup>77</sup> ] | 4.55  | 72.4       | 6573       |
| Theory [Ref. <sup>78</sup> ] | 4.39  | 73.2       | 6685       |
| Theory [Ref. <sup>79</sup> ] | 4.47  | 73         | 6688       |
| Expt.[Ref. <sup>80</sup> ]   | 4.40  | 72.5       | 6444       |
| Expt.[Ref. <sup>81</sup> ]   | 4.40  | 73.4       | 6670       |
| Expt.[Ref. <sup>82</sup> ]   | -     | -          | 6669.9±0.5 |

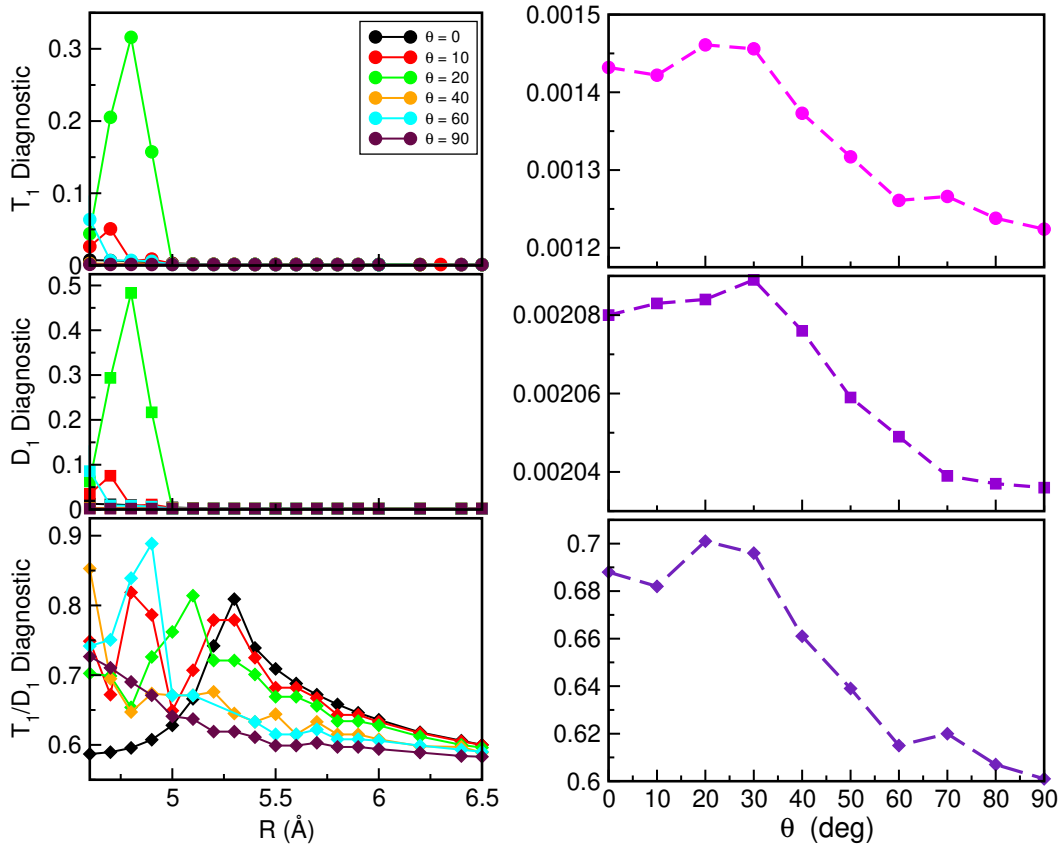

Fig. S1: CC diagnostics as a function of  $R$  at the indicated  $\theta$  values (left panels), and as a function of  $\theta$  at each  $R_e(\theta)$  value (right panels) for the HeK<sub>2</sub><sup>+</sup>.

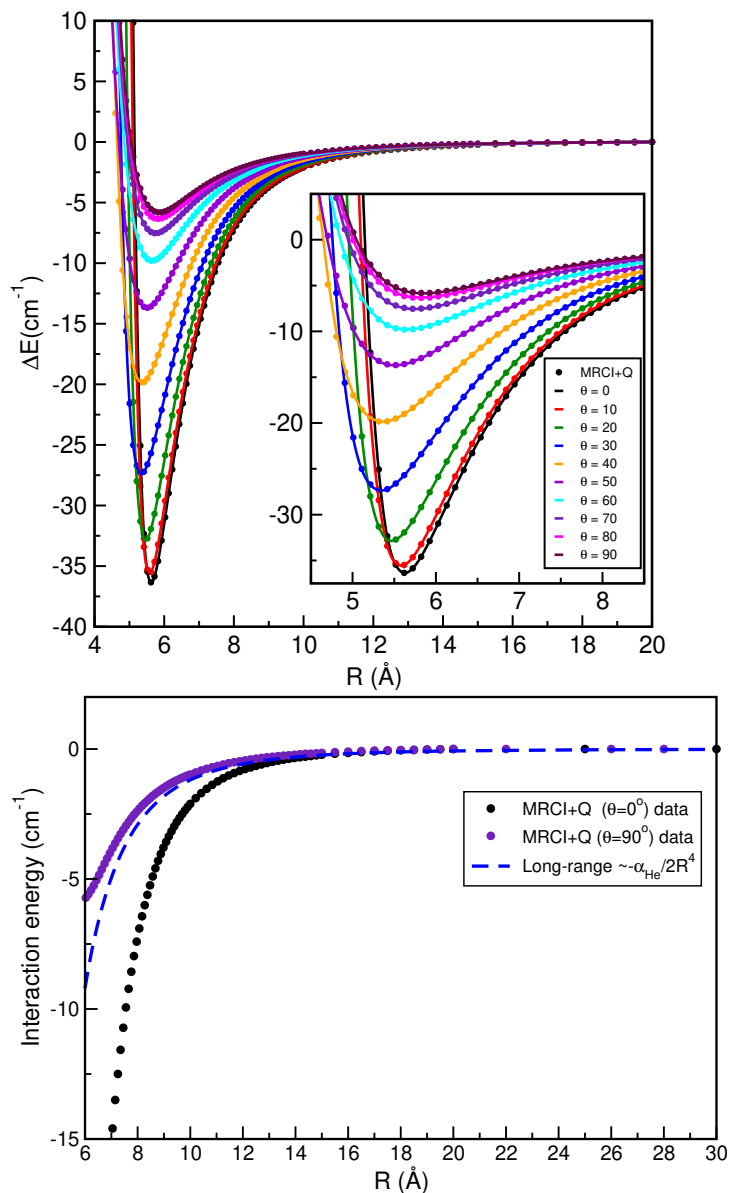

Fig. S2: (Left panel) MRCI+Q interaction energies and RKHS potential curves (left panel) as a function of  $R$  and  $\theta$  coordinates for  $r_e=4.4 \text{ \AA}$  for the  $\text{HeK}_2^+$ . (Right panel) Comparison of the MRCI+Q interactions energies for the indicated  $\theta$  values with the expected  $\sim R^{-4}$  asymptotic behaviour at large values of  $R$  (see text).

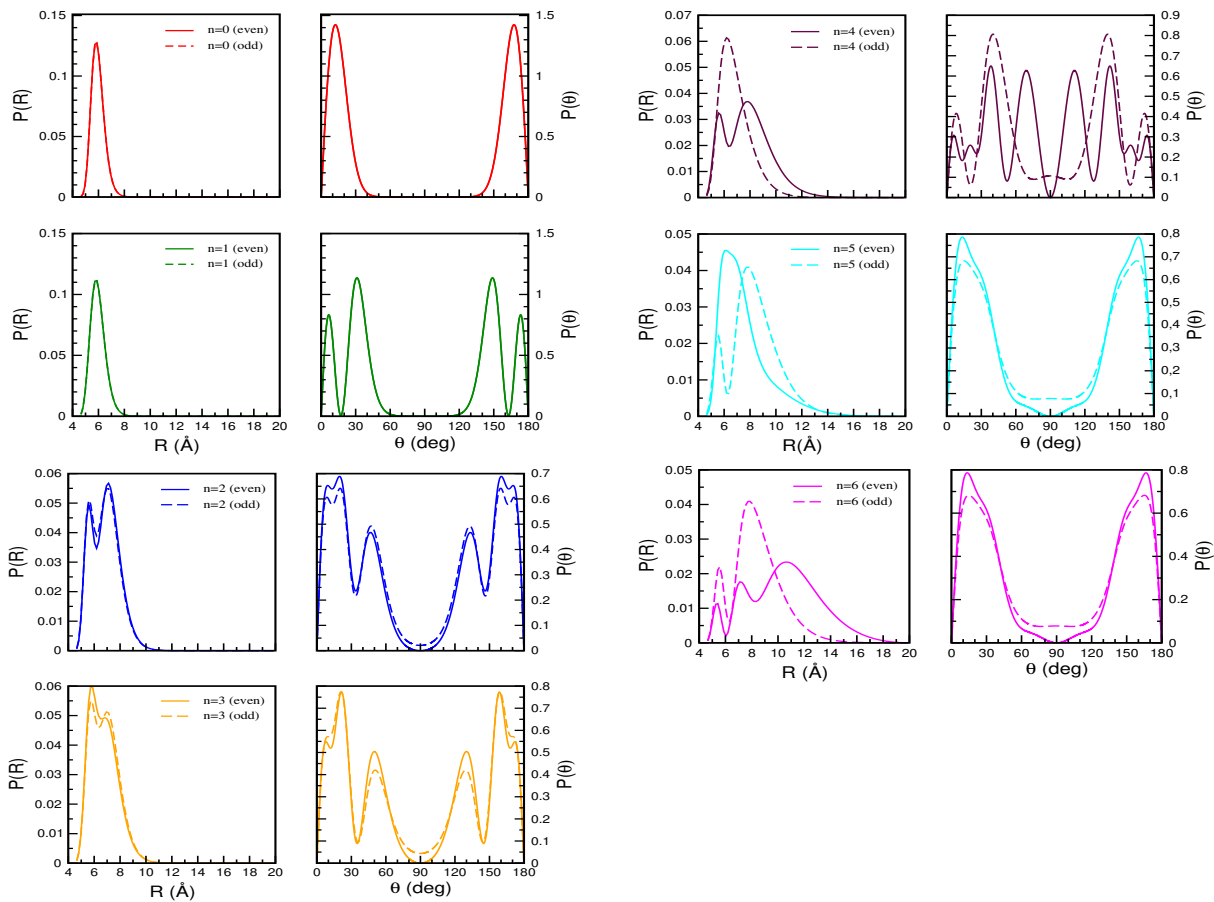

Fig. S3: Radial and angular distributions of all even/odd parity bound states of  $\text{HeK}_2^+$  using the MRCI+Q/RKHS surface.

Table S2: Potential energies (in  $\text{cm}^{-1}$ ) of the indicated optimal structures of the  $\text{He}_n\text{K}_2^+$  clusters obtained from the present sum-of-potential approach (see Eq. 4), and comparison with previous theoretical data available<sup>10,46</sup>.

| <b>N (He atoms)</b> | $(T_1/T_2, L_1/L_2, B_1/B_2)$ | <b>This Work</b> | <b>From ref. <sup>46</sup></b> | <b>From ref. <sup>10</sup></b> |
|---------------------|-------------------------------|------------------|--------------------------------|--------------------------------|
| 1                   | (0/0, 1/0, 0/0)               | -36.35           | -37.6                          | -37.41                         |
|                     | (1/0, 0/0, 0/0)               | -5.82            | -3.8                           | -                              |
| 2                   | (0/0, 0/0, 2/0)               | -76.48           | -73.9                          | -                              |
|                     | (0/0, 1/1, 0/0)               | -72.69           | -74.1                          | -75.01                         |
|                     | (0/0, 1/0, 1/0)               | -71.04           | -                              | -                              |
|                     | (0/0, 2/0, 0/0)               | -49.04           | -44.8                          | -                              |
|                     | (1/0, 1/0, 0/0)               | -42.18           | -41.3                          | -                              |
|                     | (1/1, 0/0, 0/0)               | -11.64           | -7.5                           | -                              |
| 3                   | (0/0, 0/0, 3/0)               | -123.90          | -116.5                         | -119.40                        |
|                     | (0/0, 1/0, 0/2)               | -112.83          | -109.4                         | -                              |
|                     | (0/0, 1/0, 2/0)               | -106.13          | -82.7                          | -                              |
|                     | (0/0, 1/2, 0/0)               | -85.39           | -81.3                          | -                              |
|                     | (1/0, 1/1, 0/0)               | -78.56           | -77.8                          | -                              |
| 4                   | (0/0, 0/0, 4/0)               | -166.13          | -146.4                         | -156.80                        |
|                     | (0/0, 0/0, 2/2)               | -152.97          | -143.9                         | -                              |
|                     | (0/0, 1/1, 2/0)               | -142.50          | -81.4                          | -                              |
|                     | (0/0, 2/0, 0/2)               | -125.53          | -88.5                          | -                              |
|                     | (0/0, 2/2, 0/0)               | -98.08           | -116.6                         | -                              |
|                     | (1/1, 1/1, 0/0)               | -84.43           | -119.9                         | -                              |
| 5                   | (0/0, 0/0, 5/0)               | -204.33          | -156.6                         | -                              |
|                     | (0/0, 0/0, 3/2)               | -200.40          | -184.9                         | -                              |
|                     | (0/0, 1/0, 2/2)               | -182.42          | -154.1                         | -                              |
|                     | (1/0, 0/0, 2/2)               | -158.95          | -147.6                         | -                              |
| 6                   | (0/0, 0/0, 0/6)               | -251.40          | -                              | -                              |
|                     | (0/0, 0/0, 3/3)               | -247.71          | -225.0                         | -                              |
|                     | (0/0, 1/1, 2/2)               | -212.32          | -164.6                         | -                              |
