# Supplementary figures and images for: Modelling interactions of cationic dimers in He droplets: microsolvation trends in HenK2+ clusters
Source: Royal Society of Chemistry journal article supplement (doi:10.1039/d0cp05406b), 2020-11-11

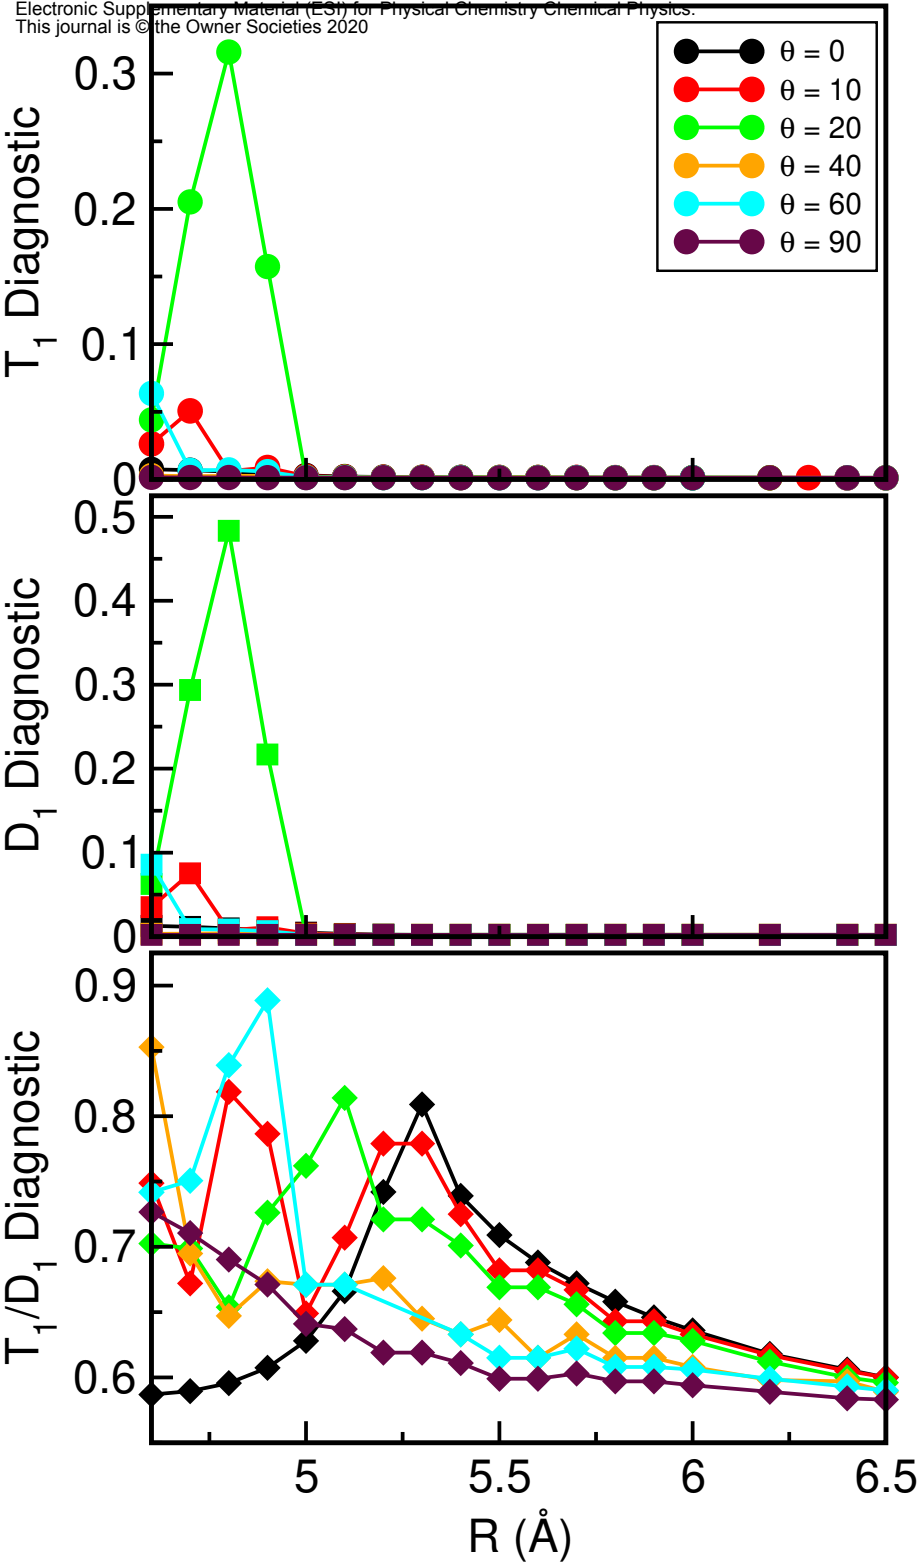

Supplement: d0cp05406b2.pdf [file d0cp05406b2.pdf]

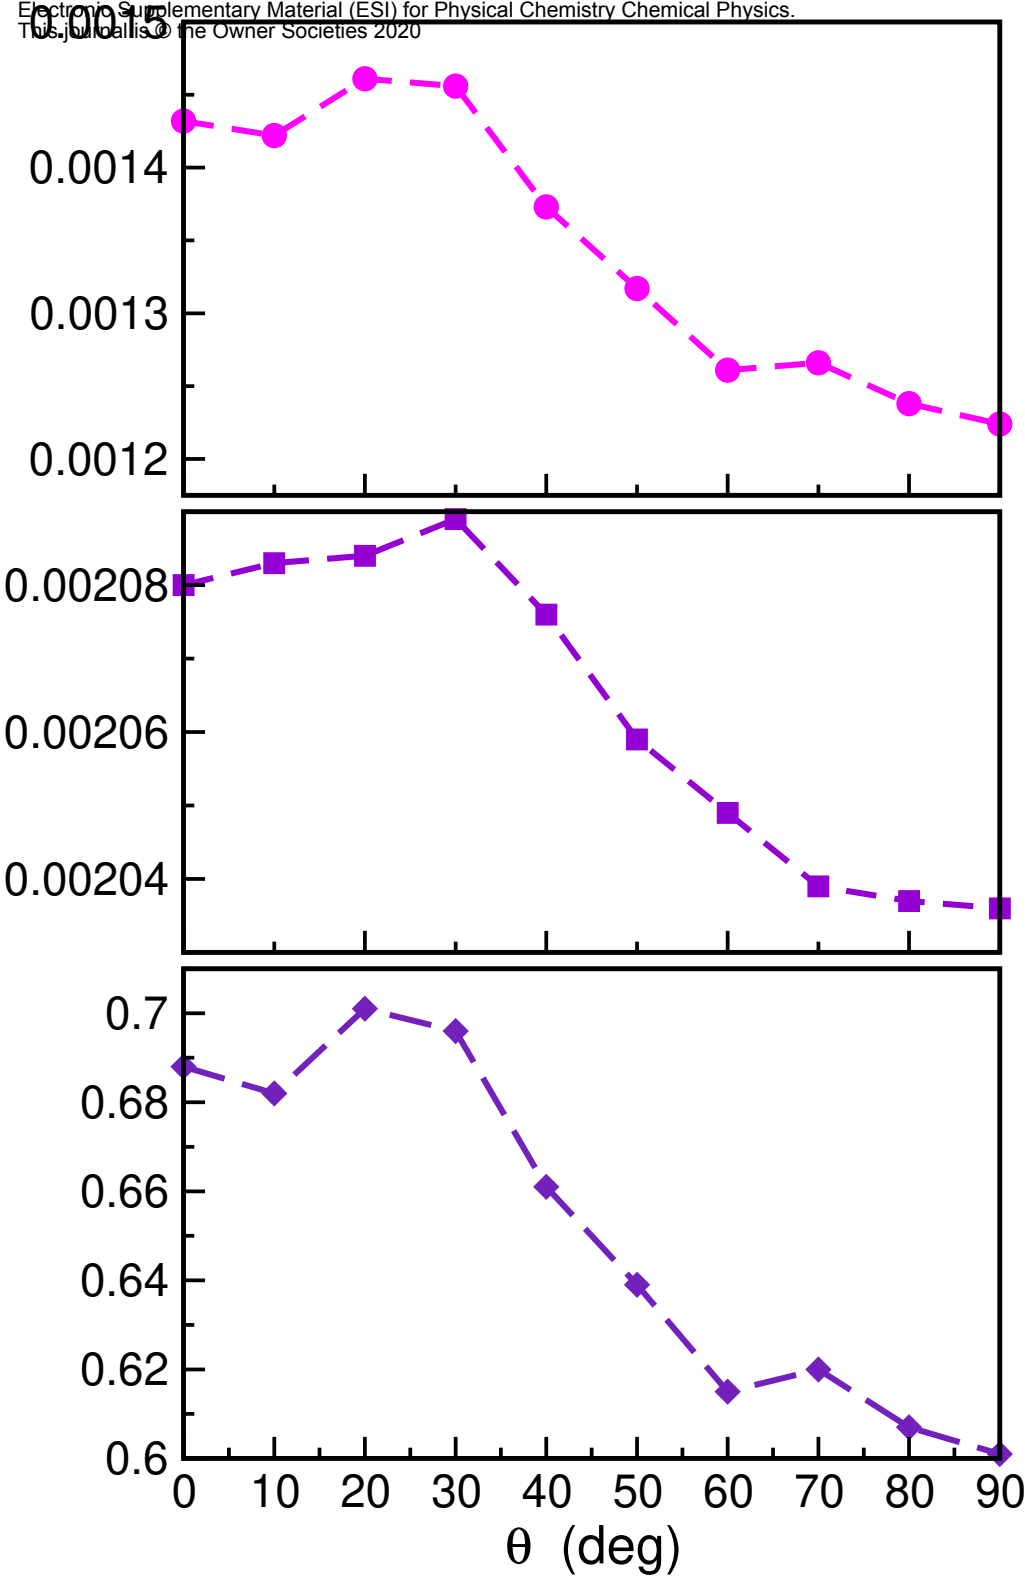

Supplement: d0cp05406b3.pdf [file d0cp05406b3.pdf]

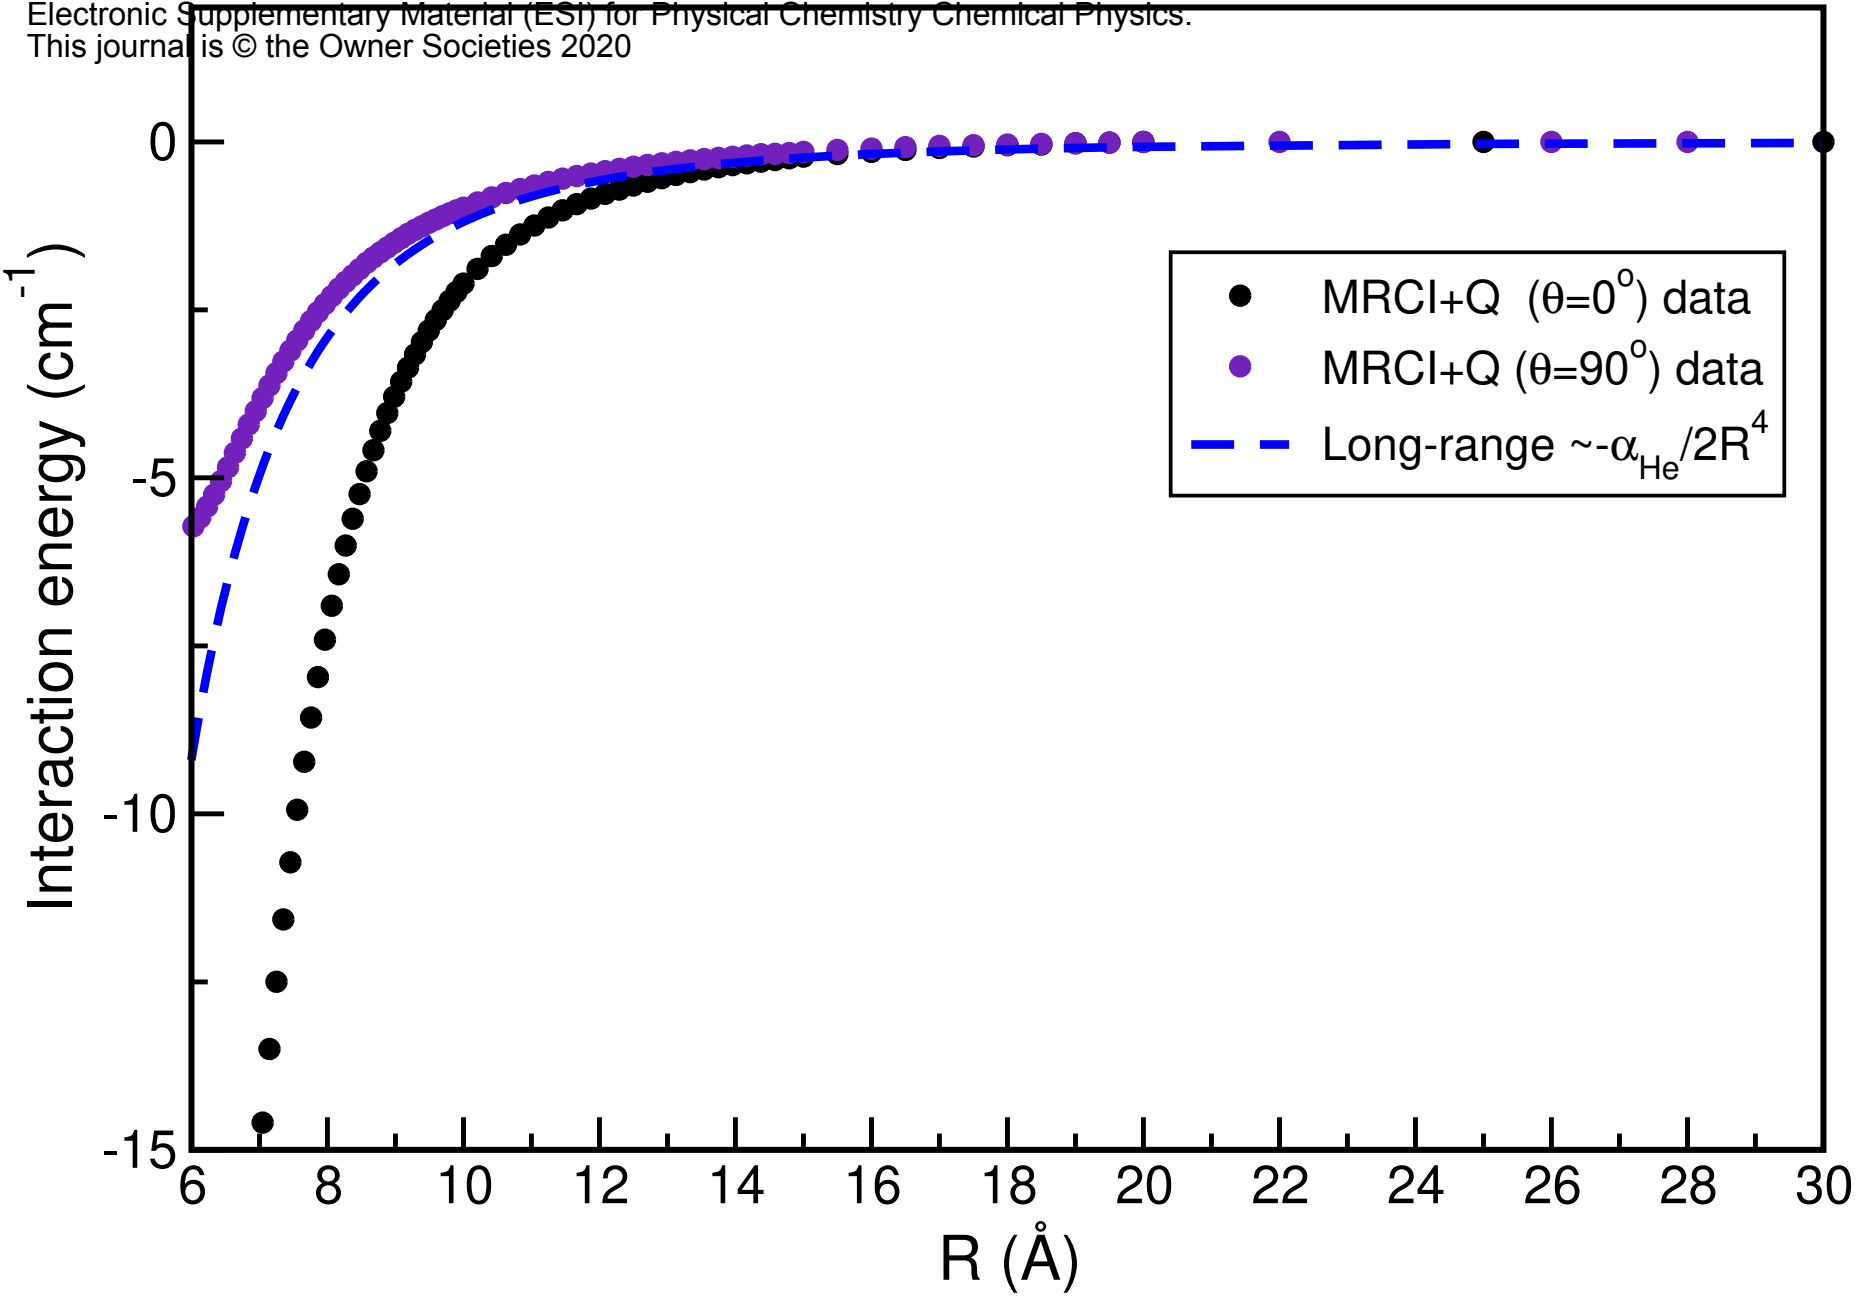

Supplement: d0cp05406b5.pdf [file d0cp05406b5.pdf]
